# Supplementary material for: Silicon dioxide@graphene oxide-graft-poly(γ-benzyl-l-glutamate) as an advanced hybrid nanofiller reinforces poly(l-lactide)
Source: Royal Society of Chemistry journal article supplement (doi:10.1039/c5ra27104e), 2016-01-01
Supplement: c5ra27104e1.pdf [file c5ra27104e1.pdf]

## Electrostatic Supporting Information

### Silicon dioxide@graphene oxide-graft-poly( $\gamma$ -benzyl-L-glutamate) as advanced hybrid nanofiller reinforces poly(L-lactide)

Pei-Yao Guo-Wang,<sup>†a</sup> Jian-Xun Ding,<sup>†b</sup> Wei Guo,<sup>a</sup> Hui-Yong Wu,<sup>a</sup> Jun-Chao Wei,<sup>a\*</sup> Yan-Feng Dai,<sup>a</sup> Feng-Jie Deng<sup>a</sup>

<sup>a</sup>College of Chemistry, Nanchang University Nanchang 330031, P.R.China, E-mail: weijunchao@ncu.edu.cn

<sup>b</sup>Key Laboratory of Polymer Ecomaterials, Changchun Institute of Applied Chemistry, Chinese Academy of Sciences, Changchun 130022, P. R. China

<sup>†</sup>These authors contributed equally to this work.

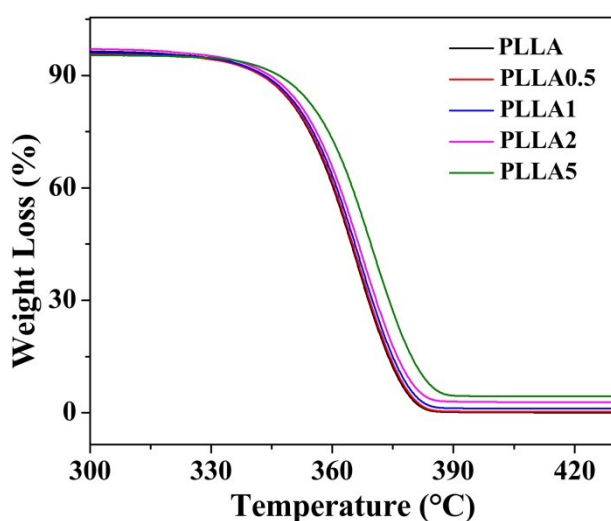

**Fig. S1** TGA decomposition graphs of pure PLLA and its nanocomposites with different SiO<sub>2</sub>@GO-g-PBLG contents.
